# Supplementary material
Source: publisher figshare collection journal article supplement (https://acs.figshare.com/ndownloader/files/4078000)
Supplement: Supplementary file 1 [file 4078000]

## **Supporting Information**

### **Low-threshold nanowire laser based on composition-symmetric semiconductor nanowires**

Pengfei Guo,<sup>†</sup> Xiujuan Zhuang,<sup>†</sup> Jinyou Xu,<sup>†</sup> Qinglin Zhang, Wei Hu, Xiaoli Zhu,  
Xiaoxia Wang, Qiang Wan, Pengbin He, Hong Zhou and Anlian Pan<sup>\*</sup>

Key Laboratory for Micro-Nano Physics and Technology of Hunan Province, State  
Key Laboratory of Chemo/Biosensing and Chemometrics, College of Physics and  
Microelectronics Science, Hunan University, Changsha 410082, China

#### **Corresponding Author**

<sup>\*</sup>E-mail: anlian.pan@hnu.edu.cn

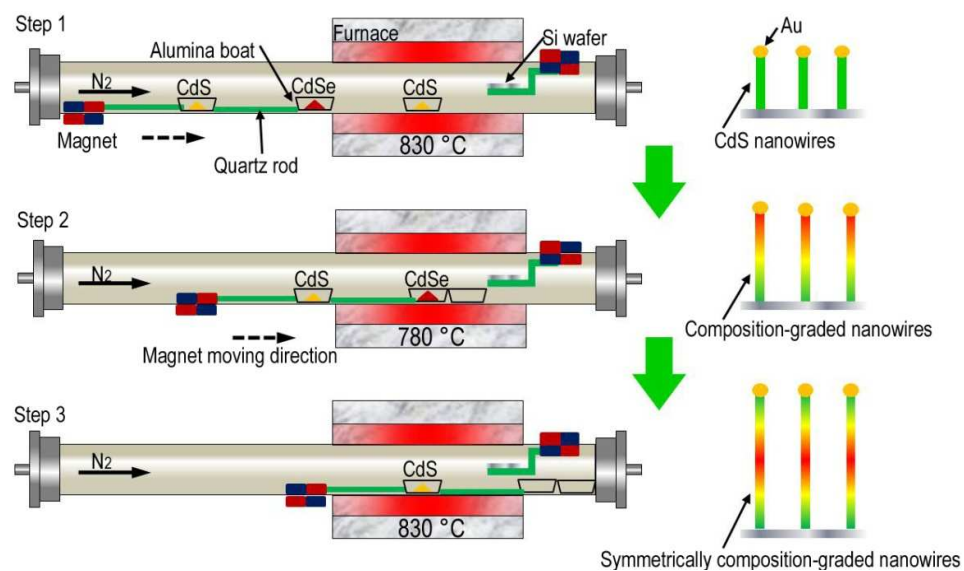

**Figure S1.** Schematic diagrams of the experimental setup and the growth processes for the symmetrically composition-graded NWs.

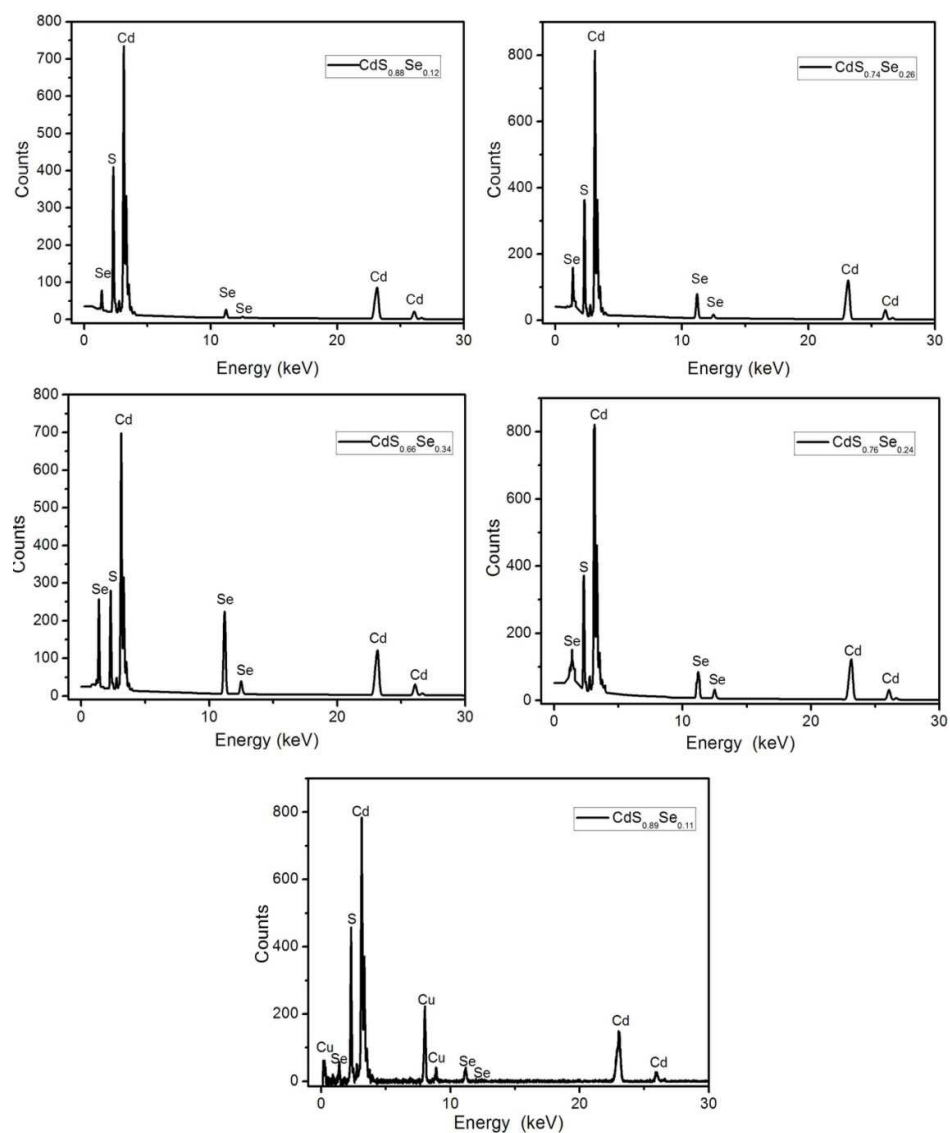

**Figure S2.** Alloy compositions of the symmetrically composition-graded NWs (given in Figure 2B), collected from the *in situ* TEM-EDS results (Philip Tecnai F20).

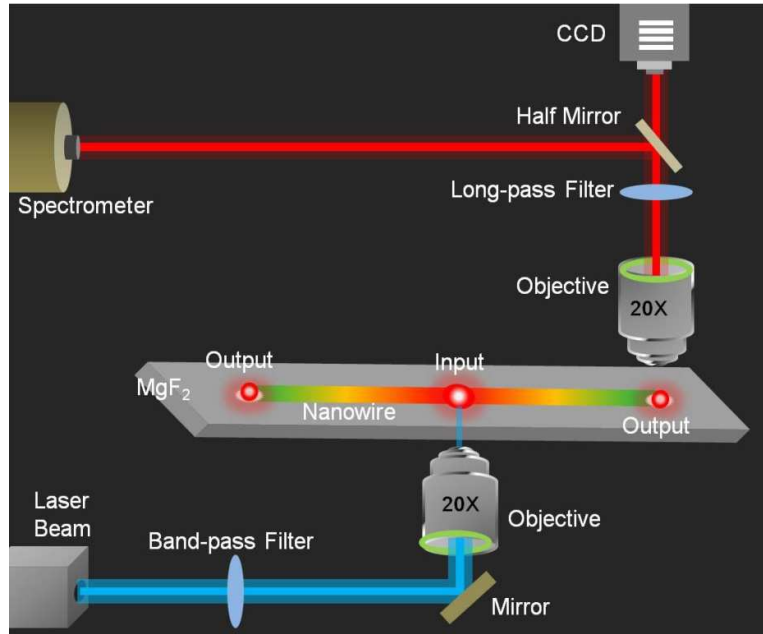

**Figure S3.** Schematic demonstration of the experimental setup for the optical characterization.

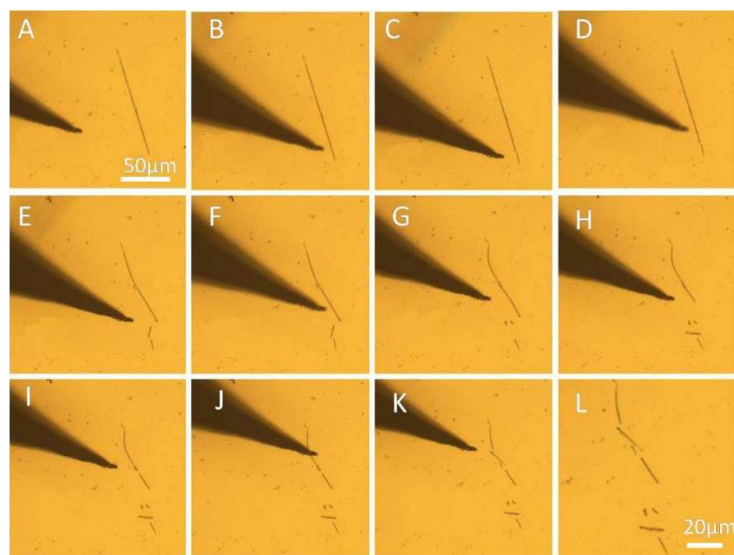

**Figure S4.** Optical microscope images of cutting NWs by homemade wolfram probe.

The micromanipulation is carried out by a homemade wolfram probe mounted on a precisely controlled 3-dimensional moving stage under an optical microscope equipped with a long-distance objective. The optical images (from A to L) illustrate the whole process.

This material is available free of charge via the Internet at <http://pubs.acs.org>.
